# Supplementary material for: Involvement of the miR-363-5p/P2RX4 Axis in Regulating Schwann Cell Phenotype after Nerve Injury
Source: MDPI journal article supplement (doi:10.3390/ijms222111601), 2021-10-27
Supplement: s1 [file s1]

**Supplementary table S2.** Antibodies used in this study were listed

| Name                 | Immunogen                                                      | Source     | Catalog number                           | RRID        |
|----------------------|----------------------------------------------------------------|------------|------------------------------------------|-------------|
| Anti-P2RX4           | Synthetic peptide corresponding to Mouse P2X4 aa 56-69         | Abcam      | ab134559<br>Goat polyclonal              | AB_2891248  |
| Anti-MBP             | Human myelin basic protein from brain                          | Sigma      | AB980<br>Polyclonal antibody             | AB_11211843 |
| Anti-MPZ             | peptide mapping near the C-terminus of zero of human origin.   | Santa cruz | sc-18533<br>Goat polyclonal antibody     | AB_2250708  |
| Anti-c-JUN           | amino acids 1-79 of c-Jun of human origin.                     | Santa cruz | sc-74543<br>Mouse monoclonal antibody    | AB_1121646  |
| Anti-ED-1            | Rat spleen cells                                               | Bio-Rad    | MCA341R<br>Mouse monoclonal antibody     | AB_2291300  |
| Anti-Lamp1           | NIH/3T3 mouse embryo fibroblast tissue culture cell membranes. | Santa cruz | sc-19992<br>Rat monoclonal antibody      | AB_2134495  |
| Anti-DYKDDDDK-tag    | A synthetic peptide (DYKDDDDK) coupled to KLH                  | GenScript  | Cat# A00187<br>Mouse monoclonal antibody | AB_1720813  |
| Anti-GAPDH           | Recombinant fragment                                           | Abcam      | ab181603<br>Rabbit monoclonal            | AB_2687666  |
| Anti- $\beta$ -actin | Recombinant fragment                                           | Sigma      | A5441<br>Mouse monoclonal antibody       | AB_476744   |

|           |                                                            |            |                                 |             |
|-----------|------------------------------------------------------------|------------|---------------------------------|-------------|
| Anti-S100 | Full length<br>native protein<br>(purified)                | Abcam      | ab34686<br>Rabbit<br>polyclonal | AB_777793   |
| Anti-p75  | NGFR p75<br>from A875<br>melanoma cells<br>of human origin | Santa cruz | Sc-58567<br>Mouse<br>monoclonal | AB_10714958 |

**Supplementary Table S3.** Mouse Primer sequences used for the RT-qPCR analysis

| Genes (Mouse) | Forward (5'-3')               | Reverse (5'-3')                 |
|---------------|-------------------------------|---------------------------------|
| P2RX4         | CCC TTT GCC TGC CCA GAT<br>AT | CCG TAC GCC TTG GTG AGT<br>GT   |
| KROX 20       | TTGACCAGATGAACGGAGTG          | ACCAGGGTACTGTGGGTCAA            |
| MBP           | TACCCTGGCTAAAGCAGAGC          | GAGGTGGTGTTCGAGGTGTC-           |
| MPZ           | GGT CCT GAG TTC AAA TCC C     | GAA CCT TCA TCT GTT GTT<br>GG   |
| GAPDH         | CAT GGC CTT CCG TGT TCC<br>TA | CCT GCT TCA CCA CCT TCT<br>TGAT |

**Supplementary Table 4.** Rat primer sequences used for the RT-qPCR analysis

| Genes (Rat) | Forward (5'-3')                | Reverse (5'-3')                |
|-------------|--------------------------------|--------------------------------|
| P2RX4       | TGC GAC TGG AAG ATG TGT<br>TC  | CAA GAG GGT GAA GTT TTC<br>TGC |
| EDH1        | TGA TGT TGA GTG GGT AGT<br>TGG | TGT TAG GCA GCT TGG ACT<br>TC  |
| Krox20      | CAG TAC CCT GGT GCC AGC<br>TG  | TGT GGA TCT CTC TGG CAC<br>GG  |
| MBP         | GGCACGCTTTCCAAAATCT            | CGGGATTAAGAGAGGGTCTG-          |
| SLC7A1      | AGA AGC TAA GTA TGC AGT<br>GGC | CCA CGA AGG CAT AAA AGC<br>AG  |
| GAPDH       | GAC ATG CCG CCT GGA GAA<br>AC  | AGC CCA GGA TGC CCT TTA<br>GT  |
