# Supplementary material for: Involvement of the miR-363-5p/P2RX4 Axis in Regulating Schwann Cell Phenotype after Nerve Injury
Source: Int J Mol Sci. 2021 Oct 27;22(21):11601. doi: 10.3390/ijms222111601 (PMC8584002; doi:10.3390/ijms222111601)
Supplement: Supplementary file 1 [file ijms-22-11601-s001.zip]

Archive with 4 entries (4 files):
- supplement table S1.xlsx
- supplementary table2.3.pdf
- SUPPLME MATERIAL.pdf
- suppplementary20210621.pptx
