# Supplementary material for: Involvement of the miR-363-5p/P2RX4 Axis in Regulating Schwann Cell Phenotype after Nerve Injury
Source: Int J Mol Sci. 2021 Oct 27;22(21):11601. doi: 10.3390/ijms222111601 (PMC8584002; doi:10.3390/ijms222111601)
Supplement: Supplementary file 1 [file ijms-22-11601-s001.zip › supplement table S1.xlsx]

## Sheet: Sheet1
	Fold change	p-value	Average normalized RC(log2)		normalized RC(log2)				Raw DC(log2)
Gene symbol	cAMP /con	cAMP /con	con	cAMP	con	con	cAMP	cAMP	con	con	cAMP	cAMP
rno-miR-341	0.210218	0.0510864	6.10699	3.85695	5.83747	6.334	3.23301	4.29108	48	72	10	23
rno-miR-129-5p	0.230043	0.0165291	8.80228	6.68226	8.9384	8.65197	6.77962	6.57785	419	362	125	115
rno-miR-543-3p	0.234252	0.0498388	4.41555	2.32169	4.65128	4.13364	2.36766	2.27421	21	15	5	5
rno-miR-135a-5p	0.251078	0.134546	2.73491	0.741113	2.20698	3.12056	0.786636	0.694106	3	7	1	1
rno-miR-21-3p	0.2642	0.00800374	3.81389	1.89359	3.90144	3.72067	1.76992	2.00749	12	11	3	4
rno-miR-409a-3p	0.266628	0.0676175	4.45343	2.54633	4.7148	4.13399	2.36719	2.70565	22	15	5	7
rno-miR-434-5p	0.26799	0.037347	9.76667	7.86692	9.54047	9.96217	7.80376	7.92744	636	899	255	294
rno-miR-381-3p	0.274586	0.00187629	6.36454	4.49987	6.33281	6.39559	4.37518	4.61464	68	75	23	29
rno-miR-31a-3p	0.289324	0.243077	3.32025	1.531	2.54185	3.82307	0.759496	2.03099	4	12	1	4
rno-miR-539-5p	0.294529	0.462082	2.25503	0.491505	0.0893492	3.08457	0.857441	0	0	7	1	0
rno-miR-455-5p	0.311369	0.00739447	12.1887	10.5054	12.245	12.1302	10.2838	10.6975	4151	4043	1426	2009
rno-miR-376b-5p	0.313363	0.00991952	5.10886	3.43477	5.07457	5.14235	3.10069	3.70584	28	31	9	15
rno-miR-126a-3p	0.313923	0.00534162	9.02474	7.35323	8.95256	9.09349	7.29525	7.40896	423	492	179	205
rno-miR-1949	0.315506	1	1.66426	0	1.68012	1.64822	0	0	2	2	0	0
rno-miR-19a-3p	0.325943	0.00292189	3.50305	1.88575	3.5388	3.4664	1.76326	1.99864	9	9	3	4
rno-miR-148a-5p	0.326588	0.0121869	9.23826	7.62381	9.31775	9.15414	7.38824	7.82625	545	513	191	274
rno-miR-148a-3p	0.335032	0.00196609	12.9082	11.3306	12.928	12.8882	11.2135	11.4389	6665	6838	2717	3359
rno-miR-3558-5p	0.335706	0.41595	2.69705	1.12231	1.18913	3.4181	1.41705	0.751495	1	9	2	1
rno-miR-673-3p	0.342258	0.169655	3.32108	1.77423	3.00476	3.58036	0	2.54624	6	10	0	6
rno-miR-300-3p	0.34312	0.0127326	7.62996	6.08675	7.52818	7.72503	5.95013	6.21153	157	190	70	89
rno-miR-1843b-5p	0.346735	0.0302425	9.37144	7.84335	9.52167	9.20374	7.67414	7.99478	628	531	233	308
rno-miR-6329	0.361584	0.0123348	6.82355	5.35595	6.92261	6.71717	5.3223	5.38883	103	94	45	50
rno-miR-22-5p	0.364168	0.0224723	10.5762	9.11885	10.4335	10.706	9.02389	9.20794	1182	1506	595	715
rno-miR-142-3p	0.369302	1	1.43713	0	1.71686	1.08979	0	0	2	1	0	0
rno-miR-466c-3p	0.375017	1	1.41497	0	2.10861	0.0290294	0	0	3	0	0	0
rno-miR-376b-3p	0.380961	1	1.39228	0	1.08759	1.64371	0	0	1	2	0	0
rno-miR-6328	0.385366	0.115669	4.83367	3.45797	4.45817	5.13134	3.50002	3.41465	18	31	12	12
rno-miR-370-3p	0.386298	0.000848327	6.79032	5.4181	6.77618	6.80431	5.47304	5.36098	93	100	50	49
rno-miR-139-5p	0.391279	0.11799	6.39803	5.0443	6.02459	6.69441	4.93106	5.14929	55	93	34	42
rno-miR-493-3p	0.401472	0.0741543	6.00785	4.69122	5.74462	6.23038	4.84453	4.51966	45	67	32	27
rno-miR-329-5p	0.404891	0.0111913	7.33598	6.03159	7.39292	7.2767	5.84511	6.1967	143	139	65	88
rno-miR-152-5p	0.406076	0.0043376	6.37519	5.07501	6.41239	6.33701	4.96702	5.17549	72	72	35	43
rno-miR-542-5p	0.407405	0.0904951	5.69236	4.39689	5.94056	5.39239	4.25598	4.52525	52	37	21	27
rno-miR-127-5p	0.412875	0.357209	4.71826	3.44203	5.29546	3.7413	3.24508	3.61531	33	11	10	14
rno-miR-330-5p	0.416224	0.0192402	8.76201	7.49744	8.63835	8.8759	7.49049	7.50435	340	423	205	219
rno-miR-301b-3p	0.418642	0.192265	2.84386	1.58765	3.15958	2.43911	0.814269	2.08841	7	4	1	4
rno-miR-122-5p	0.42132	0.445942	4.59855	3.35154	3.22398	5.28948	3.26616	3.43214	7	35	10	12
rno-miR-378a-5p	0.422293	0.151913	2.84429	1.60061	3.16006	2.43946	1.82947	1.32847	7	4	3	2
rno-miR-1843a-5p	0.422648	0.0157644	7.49572	6.25325	7.59779	7.38587	6.262	6.24444	165	150	87	91
rno-miR-495	0.430554	0.0840084	5.49627	4.28054	5.22139	5.72706	4.38316	4.17005	31	47	23	21
rno-miR-346	0.434474	0.292724	3.87255	2.66989	4.35531	3.14178	2.80489	2.52093	17	7	7	6
rno-miR-34b-5p	0.436546	0.105798	4.26611	3.07032	4.52543	3.94974	2.96123	3.17174	19	13	8	10
rno-miR-196b-5p	0.43753	0.0191001	3.40981	2.21727	3.51231	3.29947	2.12093	2.30757	9	8	4	5
rno-miR-149-5p	0.437563	0.00468415	13.0471	11.8546	12.9952	13.0972	11.9053	11.8022	6983	7904	4389	4321
rno-miR-140-5p	0.441931	0.0216876	7.56065	6.38255	7.53797	7.58299	6.08612	6.62832	158	172	77	119
rno-miR-145-3p	0.444392	0.500452	1.66914	0.49904	0.074951	2.40794	0.869117	0	0	4	1	0
rno-miR-24-1-5p	0.446619	0.0105668	7.38854	6.22566	7.31239	7.46088	6.14127	6.30539	135	158	80	95
rno-miR-451-5p	0.449198	0.118754	2.74455	1.58998	2.7759	2.71251	2.13838	0.694413	5	5	4	1
rno-miR-503-3p	0.455598	0.0464661	5.1016	3.96744	4.9145	5.2672	3.96982	3.96505	25	34	17	18
rno-miR-183-5p	0.458805	0.284214	3.47121	2.34716	2.79751	3.92865	2.38887	2.30421	5	13	5	5
rno-miR-126a-5p	0.461396	0.174812	3.05813	1.9422	3.33972	2.7079	1.39037	2.34039	8	5	2	5
rno-miR-99a-5p	0.463458	0.000355782	17.0695	15.96	17.0635	17.0755	15.9885	15.931	117158	124591	74408	75607
rno-miR-134-5p	0.467741	0.0247998	9.38852	8.2923	9.261	9.50567	8.32835	8.25532	524	655	367	369
rno-miR-135a-3p	0.469834	1	1.08978	0	1.10772	1.07161	0	0	1	1	0	0
rno-miR-509-5p	0.471533	1	1.08457	0	1.1015	1.06743	0	0	1	1	0	0
rno-miR-344g	0.477511	1	1.06639	0	1.07981	1.05285	0	0	1	1	0	0
rno-miR-488-3p	0.477511	1	1.06639	0	1.07981	1.05285	0	0	1	1	0	0
rno-miR-673-5p	0.47777	0.011539	2.84637	1.78075	2.76462	2.92373	1.81937	1.74108	5	6	3	3
rno-miR-3583-5p	0.478461	1	1.06353	0	1.66628	0.00879902	0	0	2	0	0	0
rno-miR-3577	0.483298	1	1.04902	0	0.0194729	1.64369	0	0	0	2	0	0
rno-miR-3593-3p	0.485045	1	1.04381	0	0.0131442	1.63885	0	0	0	2	0	0
rno-miR-129-2-3p	0.490462	0.0439658	5.54285	4.51506	5.67768	5.39411	4.65822	4.35612	43	37	28	24
rno-miR-24-2-5p	0.491125	0.0232598	10.9889	9.96309	11.0591	10.9152	9.77074	10.1328	1824	1741	999	1358
rno-miR-138-5p	0.493256	0.0248346	3.69042	2.67082	3.78192	3.59272	2.80567	2.52206	11	10	7	6
rno-miR-139-3p	0.498478	0.251619	2.43765	1.43325	2.46047	2.41446	0	2.13786	4	4	0	4
rno-miR-20b-5p	21.4046	0.0133371	4.0733	8.49315	4.33436	3.75433	8.3237	8.64478	16	11	364	480
rno-miR-335	12.8066	0.00312205	4.33001	8.00883	4.24685	4.40864	7.93263	8.0812	15	18	277	324
rno-miR-146b-3p	11.0669	0.0208297	0.126239	3.59442	0.15068	0.101376	3.77503	3.38791	0	0	14	11
rno-miR-363-5p	9.35771	0.0149585	0.0902309	3.31639	0.10783	0.072415	3.46756	3.1475	0	0	11	9
rno-miR-212-5p	8.25661	0.0167841	2.78589	5.83144	2.27611	3.16182	5.9814	5.66407	3	7	70	59
rno-miR-363-3p	5.91578	0.000275309	7.94745	10.512	7.87802	8.01368	10.4957	10.5282	200	232	1650	1784
rno-miR-17-2-3p	5.82984	0.00385361	5.90236	8.44581	5.78639	6.00969	8.37204	8.51599	46	57	377	440
rno-miR-653-5p	5.54066	0.00415256	1.17183	3.64189	1.20563	1.13723	3.56363	3.71613	1	1	12	14
rno-miR-20b-3p	5.20782	0.0557212	2.50689	4.88757	1.84899	2.95705	4.5901	5.13406	2	6	26	40
rno-miR-204-3p	4.38925	0.0106787	4.19221	6.32618	4.14176	4.24095	6.43729	6.2058	14	16	97	87
rno-miR-3590-3p	4.04948	0.00124243	1.18661	3.20435	1.22322	1.14905	3.16664	3.24109	1	1	9	10
rno-miR-344i	3.62144	0.0225377	0.688942	2.54551	0.096167	1.10787	2.45669	2.62917	0	1	5	6
rno-miR-501-5p	3.58235	0.0945356	0.0356289	1.87653	0.0426588	0.0285645	1.48265	2.18562	0	0	2	4
rno-miR-92b-5p	3.45959	0.0159191	2.18737	3.97797	2.2241	2.14967	3.84114	4.10294	3	3	15	19
rno-miR-211-5p	3.42892	0.00574662	4.27435	6.0521	4.22809	4.31916	5.97333	6.1268	15	17	70	82
rno-miR-203a-3p	3.4031	0.065912	5.16771	6.93456	5.09143	5.24016	6.63009	7.18583	28	33	112	174
rno-let-7c-1-3p	3.37457	0.0789369	3.19475	4.94945	3.23318	3.15527	5.22471	4.60899	7	7	41	28
rno-miR-3594-5p	3.23307	0.426837	0.0356727	1.72858	0.0427112	0.0285997	2.49262	0	0	0	5	0
rno-miR-92b-3p	3.10737	0.0131873	6.56144	8.19714	6.53019	6.59202	8.30597	8.07942	78	86	360	325
rno-miR-181a-2-3p	3.07549	0.0207482	4.0847	5.70552	3.56249	4.46731	5.70648	5.70456	9	19	58	61
rno-miR-203b-3p	3.06634	0.0341823	0.0493461	1.66586	0.0590538	0.0395726	1.46847	1.83947	0	0	2	3
rno-miR-3102	3.06275	0.0896384	1.51188	3.1267	2.20545	0.126247	3.00797	3.23641	3	0	8	10
rno-miR-146b-5p	2.85445	0.000289299	11.3765	12.8897	11.3803	11.3727	12.8737	12.9055	2279	2391	8588	9283
rno-miR-204-5p	2.84766	0.000848285	8.76336	10.2731	8.73347	8.79264	10.2981	10.2477	363	399	1439	1469
rno-miR-98-3p	2.69544	0.138513	0.725567	2.15609	1.17288	0.0737989	2.44865	1.7887	1	0	5	3
rno-miR-3084b-3p	2.685	0.000598125	0.0357614	1.46068	0.0428173	0.0286708	1.48251	1.43852	0	0	2	2
rno-miR-582-3p	2.65783	0.191248	0.0403087	1.45056	0.048254	0.0323195	0.89258	1.85191	0	0	1	3
rno-miR-103-1-5p	2.64618	0.000735987	0.044993	1.4489	0.0538526	0.0360786	1.47283	1.42457	0	0	2	2
rno-miR-130b-3p	2.60177	0.0275468	4.2434	5.6229	4.54717	3.85814	5.54483	5.69695	19	12	52	61
rno-miR-3064-3p	2.59997	0.22296	0.0622642	1.44076	0.0744796	0.0499445	1.87636	0.813767	0	0	3	1
rno-miR-362-5p	2.5461	0.0186177	4.85854	6.20683	4.69174	5.00804	6.09861	6.3075	21	28	77	94
rno-miR-15b-3p	2.48916	0.000160127	6.67945	7.99511	6.70163	6.65692	7.98888	8.00132	88	90	289	308
rno-miR-181b-2-3p	2.45212	0.518508	0.705993	2.00002	0.120976	1.12106	0	2.80738	0	1	0	7
rno-miR-33-3p	2.42815	0.0791	0.718905	1.99876	1.16587	0.0678858	1.85819	2.12685	1	0	3	4
rno-miR-3099	2.42488	0.144292	2.52083	3.79874	3.20458	1.17593	3.83397	3.76262	7	1	15	15
rno-miR-30c-2-3p	2.42026	0.00620114	7.6443	8.91946	7.74064	7.54106	8.86563	8.97135	182	167	532	605
rno-miR-188-5p	2.40158	0.0930997	1.15206	2.41604	1.18206	1.12143	2.66885	2.10931	1	1	6	4
rno-miR-3542	2.36292	0.0273823	2.00674	3.24732	2.22784	1.74552	3.14616	3.34185	3	2	9	11
rno-miR-181b-1-3p	2.34872	0.0610827	1.16352	2.3954	1.19572	1.13059	2.16345	2.59517	1	1	4	6
rno-miR-421-5p	2.33766	0.427797	0.0262134	1.25128	0.0313961	0.0210119	1.91113	0	0	0	3	0
rno-miR-504	2.3009	0.266876	1.95272	3.15492	1.20693	2.44192	3.56282	2.58413	1	4	12	6
rno-miR-214-3p	2.25144	0.383653	1.46639	2.63724	2.16106	0.0760885	1.85048	3.14349	3	0	3	9
rno-miR-337-3p	2.22742	0.418034	0.705278	1.86065	1.15136	0.0561499	2.46436	0.802918	1	0	5	1
rno-miR-501-3p	2.19759	0.0121975	6.86827	8.00419	6.95295	6.77832	8.08029	7.92386	105	98	308	292
rno-miR-92a-3p	2.18804	0.00836736	8.79689	9.92654	8.70121	8.88663	9.98377	9.86693	355	426	1157	1128
rno-miR-653-3p	2.10436	0.196506	2.33546	3.40885	2.97954	1.14201	3.31361	3.49818	6	1	10	12
rno-miR-17-5p	2.05197	0.0870819	9.06478	10.1018	9.12046	9.00687	9.84866	10.3171	475	463	1054	1542
